# Supplementary material
Source: PubMed Central journal article supplement (PMC6939626)
Supplement: NIHMS1547148-supplement-3.pdf [file NIHMS1547148-supplement-3.pdf]

## Supplementary Material

### **Loss of NQO1 generates genotoxic estrogen-DNA adducts in Fuchs Endothelial Corneal Dystrophy**

Taiga Miyajima<sup>a,b</sup>, Geetha Melangath<sup>a</sup>, Shan Zhu<sup>a</sup>, Neha Deshpande<sup>a</sup>, Shivakumar Vasanth<sup>a</sup>, Bodhisattwa Mondal<sup>c</sup>, Varun Kumar<sup>a</sup>, Yuming Chen<sup>a</sup>, Marianne Price<sup>d</sup>, Francis Price Jr.<sup>d</sup>, Eleanor G. Rogan<sup>c</sup>, Muhammad Zahid<sup>c</sup>, Ula Jurkunas<sup>a\*</sup>

<sup>a</sup> Schepens Eye Research Institute, Massachusetts Eye and Ear, Harvard Medical School, Boston, MA, USA

<sup>b</sup> Department of Ophthalmology, Dokkyo Medical University, Tochigi, 321-0293, Japan

<sup>c</sup> Department of Environmental, Agricultural and Occupational Health, College of Public Health, University of Nebraska Medical Center, Omaha, NE

<sup>d</sup> Price Vision Group, Indianapolis, IN, USA

\* Corresponding author: Ula V. Jurkunas, M.D., Associate Professor, Schepens Eye Research Institute, Massachusetts Eye and Ear, Department of Ophthalmology, Harvard Medical School, 20 Staniford Street, Room 245, Boston, MA, USA 02114

## Supplemental Figure 1

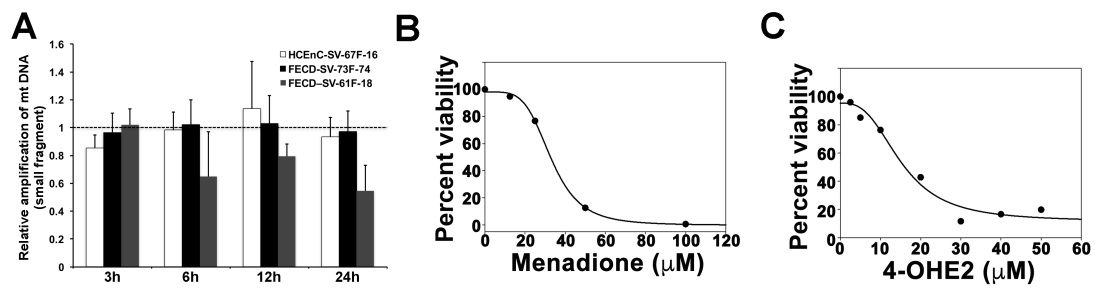

**Fig. 1. A.** Bar graph plotting the relative amplification of small mtDNA in 30  $\mu\text{M}$  4-OHE<sub>2</sub> treated HCEnc-SV-67F-16, FECD-SV-73F-74 and -61F-18 cells. Dotted line indicate the untreated samples to which the treated samples are normalized. **B, C.** Survival plots of the percent cell viability of HCEnc-21T cells treated with varying doses of MN and 4-OHE<sub>2</sub> determined by Cell Titer Glo assay.

## Supplemental Figure 2

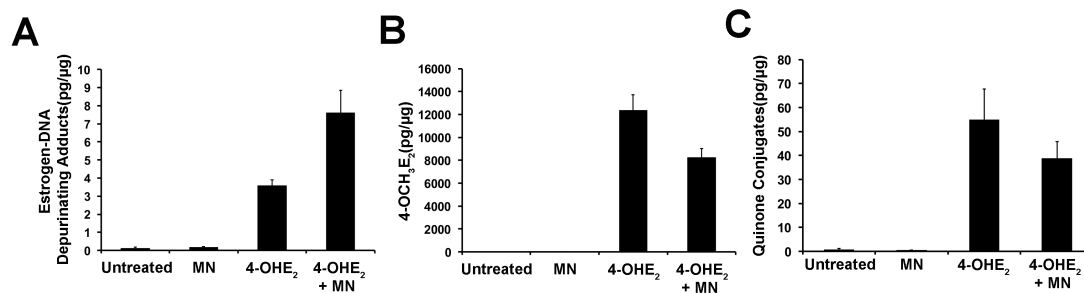

**Fig. 2. A-C.** Comparison of the levels of estrogen-DNA adducts, 4-OCH<sub>3</sub>E<sub>2</sub> and quinone conjugates in untreated HCEnc-21T cells *versus* treated with either 8.5  $\mu$ M MN alone, 3.75  $\mu$ M 4-OHE<sub>2</sub> alone or co-treated with 8.5  $\mu$ M MN and 3.75  $\mu$ M 4-OHE<sub>2</sub> by UPLC-MS/MS.
